# Supplementary material
Source: ML conference proceedings conference paper supplement (https://proceedings.mlr.press/v80/sun18d.html)
Supplement: Supplementary file 1 [file sun18d-supp.pdf]

---

## Appendix: Convolutional Imputation of Matrix Networks

---

Qingyun Sun <sup>\*1</sup> Mengyuan Yan <sup>\*2</sup> David Donoho <sup>3</sup> Stephen Boyd <sup>2</sup>

### Exact recovery guarantee

**Theorem 1.** *We assume that  $A$  is a matrix network on a graph  $G$ , and its graph Fourier transform  $\hat{A}(k)$  are a sequence of matrices, each of them is at most rank  $r$ , and  $\hat{A}$  satisfy the incoherence condition with coherence  $\mu$ . And we observe a matrix network  $A^\Omega$  on the graph  $G$ , for a subset of node in  $\Omega$  random sampled from the network, node  $i$  on the network is sampled with probability  $p_i$ , we define the average sampling rate  $p = \frac{1}{N} \sum_{i=1}^N p_i = |\Omega|/(Nn^2)$ , and define  $\mathcal{R} = \frac{1}{p} P_\Omega \mathcal{U}^*$ .*

*Then we prove that for any sampling probability distribution  $\{p_i\}$ , as long as the average sampling rate  $p > C\mu_n^{\frac{r}{n}} \log^2(Nn)$  for some constants  $C$ , the solution to the optimization problem*

$$\begin{aligned} & \underset{\hat{M}}{\text{minimize}} && \|\hat{M}\|_{*,1}, \\ & \text{subject to} && A^\Omega = \mathcal{R}\hat{M} \end{aligned}$$

*is unique and is exactly  $\hat{A}$  with probability  $1 - (Nn)^{-\gamma}$ , where  $\gamma = \frac{\log(Nn)}{16}$ .*

*Proof.* We define a inner product:  $\langle \hat{M}_1, \hat{M}_2 \rangle = \sum_k \langle \hat{M}_1(k), \hat{M}_2(k) \rangle$ . Then we have the following two inequalities

$$\|\hat{M}(k)\|_* = \mathbf{Tr}(\text{sgn}(\hat{M}(k))\hat{M}(k)) = \langle \text{sgn}(\hat{M}(k)), \hat{M}(k) \rangle.$$

Therefore,

$$\|\hat{M}\|_{*,1} = \langle \text{sgn}(\hat{M}), \hat{M} \rangle.$$

Here  $\text{sgn}(\hat{M}) = V_1 V_2^*$  is the sign matrix of the singular values of  $\hat{M}$  under the singular vector basis.

We consider  $\Delta = \hat{M} - \hat{A}$ , then either  $\mathcal{R}\Delta \neq 0$ , or  $\|\hat{A} + \Delta\|_{*,1} > \|\hat{A}\|_{*,1}$ .

---

<sup>\*</sup>Equal contribution <sup>1</sup>Department of Mathematics, Stanford University, California, USA <sup>2</sup>Department of Electrical Engineering, Stanford University, California, USA <sup>3</sup>Department of Statistics, Stanford University, California, USA. Correspondence to: Qingyun Sun <qysun@stanford.edu>.

First we define a decomposition  $\Delta = \Delta_T + \Delta_T^\perp = P_T \Delta + P_{T^\perp} \Delta$ .

For  $\mathcal{R}\Delta = 0$ , we compute

$$\begin{aligned} & \|\hat{A} + \Delta\|_{*,1} \\ & \geq \|P_1(\hat{A} + \Delta)P_2\|_{*,1} + \|P_1^\perp(\hat{A} + \Delta)P_2^\perp\|_{*,1} \\ & = \|\hat{A} + P_1\Delta P_2\|_{*,1} + \|\Delta_T^\perp\|_{*,1} \\ & \geq \langle \text{sgn}(\hat{A}), \hat{A} + P_1\Delta P_2 \rangle + \langle \text{sgn}(\Delta_T^\perp), \Delta_T^\perp \rangle \\ & = \|\hat{A}\|_{*,1} + \langle \text{sgn}(\hat{A}), P_1\Delta P_2 \rangle + \langle \text{sgn}(\Delta_T^\perp), \Delta_T^\perp \rangle \\ & = \|\hat{A}\|_{*,1} + \langle \text{sgn}(\hat{A}) + (\Delta_T^\perp), \Delta \rangle. \end{aligned}$$

Now we want to estimate  $\langle (\hat{A}) + (\Delta_T^\perp), \Delta \rangle$ . We make two assumptions, which we will prove later.

First, we assume that for all  $\Delta \in \text{range}(\mathcal{R})^\perp$ , with probability  $1 - (Nn)^{-\gamma}$ ,

$$\|\Delta_T\|_2 < 2nN\|\Delta_T^\perp\|_2.$$

Second, we want to construct a dual certificate  $K \in \text{range}(\mathcal{R})$ , such that for  $k = 3 + \frac{1}{2} \log_2(r) + \log_2(n) + \log_2(N)$ , with probability  $1 - (Nn)^{-\gamma}$ ,

$$\begin{aligned} \|P_T(K) - \mathbf{sign}(\hat{A})\|_2 & \leq \left(\frac{1}{2}\right)^k \sqrt{r}, \\ \|P_{T^\perp}(K)\|_2 & \leq \frac{1}{2}. \end{aligned}$$

Then

$$\begin{aligned} & \langle \text{sgn}(\hat{A}) + (\Delta_T^\perp), \Delta \rangle \\ & = \langle \text{sgn}(\hat{A}) + (\Delta_T^\perp) - K, \Delta \rangle \\ & = \langle \text{sgn}(\hat{A}) - K, \Delta_T \rangle + \langle (\Delta_T^\perp) - K, \Delta_T^\perp \rangle \\ & \geq \frac{1}{2} \|\Delta_T^\perp\|_2 - \left(\frac{1}{2}\right)^k \sqrt{r} \|\Delta_T\|_2 \\ & \geq \frac{1}{4} \|\Delta_T^\perp\|_2. \end{aligned}$$

When  $\hat{M}$  is a minimizer, we must have  $\Delta_T^\perp = 0$ , otherwise  $\|\hat{A} + \Delta\|_{*,1} < \|\hat{A}\|_{*,1}$ . By assumption,  $\|\Delta_T\|_2 < n^2\|\Delta_T^\perp\|_2$ ,  $\Delta_T = 0$ , then  $\Delta = 0$ . Therefore, under the two assumption,  $\hat{M}$  is the unique minimizer, and  $\hat{M} = \hat{A}$ .

Now we prove the above assumption and construct dual certificate.

First, we show that if

$$\|\Delta_T\|_2 \geq (2nN)\|\Delta_T^\perp\|_2,$$

then  $\|\mathcal{R}\Delta_T\|_2 > \|\mathcal{R}\Delta_T^\perp\|_2$ ,

$$\begin{aligned} & \|\mathcal{R}\Delta\|_2 \\ &= \|\mathcal{R}\Delta_T + \mathcal{R}\Delta_T^\perp\|_2 \\ &\geq \|\mathcal{R}\Delta_T\|_2 - \|\mathcal{R}\Delta_T^\perp\|_2 \\ &> 0. \end{aligned}$$

We have a lower bound on  $\|\mathcal{R}\Delta_T\|_2$  and upper bound on  $\|\mathcal{R}\Delta_T^\perp\|_2$ .

$$\|\mathcal{R}\Delta_T^\perp\|_2^2 \leq \|\mathcal{R}\|^2 \|\Delta_T^\perp\|_2^2.$$

Here  $\|\mathcal{R}\|$  is the operator norm of  $\mathcal{R}$ .

$$\begin{aligned} \|\mathcal{R}\Delta_T\|_2^2 &= \langle \mathcal{R}\Delta_T, \mathcal{R}\Delta_T \rangle \\ &\geq \|\mathcal{R}\|^2 / (nN)^2 (1 - \|P_T - P_T \mathcal{R} P_T\|) \|\Delta_T\|_2^2. \end{aligned}$$

Since  $E(P_T \mathcal{R} P_T) = P_T$ , we only need to control the deviation, we could use a concentration inequality called operator-Bernstein inequality (1),

$$\mathbf{P}[\|P_T - P_T \mathcal{R} P_T\| > t] \leq \exp\left(-\frac{npt^2}{4\mu r}\right).$$

Using the condition that  $p = C\mu \frac{r}{n} \log^2(Nn)$ , let  $t = 1/4$ , we have

$$\begin{aligned} & \mathbf{P}[\|P_T - P_T \mathcal{R} P_T\| > t] \\ &\leq \exp\left(-\frac{n\mu \frac{r}{n} \log^2(Nn)}{16\mu r}\right) \\ &= \exp\left(-\frac{\log^2(Nn)}{16}\right) \\ &= (nN)^{-\gamma}, \end{aligned}$$

where  $\gamma = \frac{\log(Nn)}{16}$ . Therefore, with probability  $1 - (nN)^{-\gamma}$ , the inequality holds for  $t = 1/2$ . When the inequality holds,  $\|P_T - P_T \mathcal{R} P_T\| < 1/2$ ,  $\mathcal{R}\Delta \neq 0$ .

Second, we construct the dual certificate  $K$  by the following construction: We decompose  $\Omega$  as the union of  $k$  subset  $\Omega_t$ , where each entry is sampled independently so that  $E(|\Omega_t|) = p_t = 1 - (1-p)^{1/k}$ , and define  $R_t = \frac{1}{p_t} P_{\Omega_t} U^*$ . Define

$$H_0 = (\hat{A}), K_t = \sum_{j=1}^t R_j H_{j-1}, H_t = (\hat{A}) - P_T K_t.$$

Then the dual certificate is defined as  $K = K_k$ .

This construction is called golfing scheme, which is invented in (1). Since  $p_t = p/k = C\mu \frac{r}{nk} \log^2(Nn)$ , we can assume  $\|P_T - P_T \mathcal{R}_j P_T\| < 1/2$ , which is true with probability  $1 - \exp\left(-\frac{Cnpt^2}{\mu kr}\right)$ .

$$\|H_t\|_2 \leq \|P_T - P_T \mathcal{R} P_T\| \|H_{t-1}\|_2 \leq \frac{1}{2} \|H_{t-1}\|_2.$$

And

$$\|P_T(K) - (\hat{A})\|_2 = \|H_k\|_2 \leq \left(\frac{1}{2}\right)^k \|(\hat{A})\|_2 \leq \left(\frac{1}{2}\right)^k \sqrt{r}.$$

Then

$$\|P_T(K) - (\hat{A})\|_2 \leq \left(\frac{1}{2}\right)^k \sqrt{r}.$$

Also,  $\|P_{T^\perp}(K)\| \leq \sum_{j=1}^k \|P_{T^\perp} R_j H_{j-1}\|$ , use the operator-Bernstein inequality for a sequence of  $t_j = 1/(4\sqrt{r})$ , we have  $\|P_{T^\perp} R_j H_{j-1}\| \leq t_j \|H_{j-1}\|_2$ , and since  $\|H_j\|_2 \leq \sqrt{r} 2^{-j}$ , then

$$\|P_{T^\perp}(K)\| \leq \sum_{j=1}^k t_j \|H_{j-1}\|_2 \leq \frac{1}{4} \sum_{j=1}^k 2^{-(j-1)} < 1/2.$$

Therefore,  $K$  is the dual certificate, the whole proof is done.  $\square$

**Imputation algorithm convergence** Now we show that the solution of our imputation algorithm converges asymptotically to a minimizer of the previously defined objective  $L_\lambda(\hat{M})$ .

Each step of our imputation algorithm is minimizing a surrogate  $Q_\lambda(\hat{M}|\hat{M}^{\text{old}})$  of the above objective function as

$$\|A^\Omega + P_\Omega^\perp U^{-1} \hat{M}^{\text{old}} - U^{-1} \hat{M}\|^2 + \sum_{k=1}^N \lambda_k \|\hat{M}(k)\|_*.$$

The resulting minimizer forms a sequence  $\hat{M}_\lambda^t$  with starting point  $\hat{M}_\lambda^0$

$$\hat{M}_\lambda^{t+1} = \operatorname{argmin} Q_\lambda(\hat{M}|\hat{M}_\lambda^t).$$

**Theorem 2.** *The imputation algorithm produces a sequence of iterates  $\hat{M}_\lambda^t$  that converges to the minimizer of  $L_\lambda(\hat{M})$ .*

The main idea of the proof is to show that  $Q_\lambda$  decreases after every iteration and  $\hat{M}_\lambda^t$  is a Cauchy sequence, and the limit point is a stationary point of  $L_\lambda$ .

*Proof.* For each iteration in our algorithm, we are solving for a surrogate of the objective function as

$$Q_\lambda(\hat{M}|\hat{M}^{\text{old}}) = \|A^\Omega + P_\Omega^\perp U^{-1} \hat{M}^{\text{old}} - U^{-1} \hat{M}\|^2 + \sum_{k=1}^N \lambda_k \|\hat{M}(k)\|_*.$$

And the sequence  $\hat{M}_\lambda^t$  with any starting point  $\hat{M}_\lambda^0$  is given by

$$\hat{M}_\lambda^{t+1} = \operatorname{argmin} Q_\lambda(\hat{M}|\hat{M}_\lambda^t).$$

The sequence satisfies

$$L_\lambda(\hat{M}_\lambda^{t+1}) \leq Q_\lambda(\hat{M}_\lambda^{t+1}|\hat{M}_\lambda^t) \leq L_\lambda(\hat{M}_\lambda^t).$$

Because

$$Q_\lambda(\hat{M}_\lambda^{t+1}|\hat{M}_\lambda^{t+1}) = L_\lambda(\hat{M}_\lambda^{t+1})$$

and

$$\begin{aligned} & Q_\lambda(\hat{M}|\hat{M}^{\text{old}}) \\ = & \|P_\Omega(A) + P_\Omega^\perp \mathcal{U}^{-1} \hat{M}^{\text{old}} - \mathcal{U}^{-1} \hat{M}\|^2 + \sum_{k=1}^N \lambda_k \|\hat{M}(k)\|_* \\ \geq & \|P_\Omega(A) + P_\Omega^\perp \mathcal{U}^{-1} \hat{M} - \mathcal{U}^{-1} \hat{M}\|^2 + \sum_{k=1}^N \lambda_k \|\hat{M}(k)\|_* \\ = & Q_\lambda(\hat{M}|\hat{M}) \end{aligned}$$

Below we prove the following successive differences are monotonically decreasing

$$\|\hat{M}_\lambda^{t+1} - \hat{M}_\lambda^t\|^2 \leq \|\hat{M}_\lambda^t - \hat{M}_\lambda^{t-1}\|^2.$$

and the difference sequence converges to zero,

$$\hat{M}_\lambda^{t+1} - \hat{M}_\lambda^t \rightarrow 0.$$

The successive differences are monotonically decreasing because the soft threshold operator is a contraction in  $L_2$  norm (2). And when there are positive singular values smaller than the threshold, the successive differences will strictly decrease until the algorithm converges.

Then  $\hat{M}_\lambda^t$  is a Cauchy sequence, therefore we have a set of limit points. Also by monotonic convergence theorem, since  $\hat{M}_\lambda^{t+1} - \hat{M}_\lambda^t$  converges to zero monotonically, the Cauchy sequence  $\hat{M}_\lambda^t$  has a unique limit  $\hat{M}_\lambda^\infty$ . Moreover, we can verify that  $\hat{M}_\lambda^\infty$  is a solution to the fixed point equation  $\nabla L_\lambda = 0$ , and a stationary point of  $L_\lambda(\hat{M}_\lambda)$ . Since  $L_\lambda(\hat{M}_\lambda)$  is convex, each stationary point is a minimizer. Therefore, the convergence is proved.  $\square$

## References

- [1] David Gross. Recovering low-rank matrices from few coefficients in any basis. *IEEE Transactions on Information Theory*, 57(3):1548–1566, 2011.
- [2] Rahul Mazumder, Trevor Hastie, and Robert Tibshirani. Spectral regularization algorithms for learning large incomplete matrices. *Journal of machine learning research*, 11(Aug):2287–2322, 2010.
